# Supplementary material for: Functionalized tetrahedral DNA frameworks for the capture of circulating tumor cells
Source: Springer Nature journal article supplement (doi:10.1038/s41596-023-00943-3), 2024-02-05
Supplement: MOESM1 [file 41596_2023_943_MOESM1_ESM10.pdf]

Protocol update

 Check for updates

---

# Functionalized tetrahedral DNA frameworks for the capture of circulating tumor cells

---

In the format provided by the authors and unedited

# **Functionalised tetrahedral DNA frameworks for the capture of circulating tumour cells**

Yirong Chen<sup>1,4</sup>, Meihua Lin<sup>2,4</sup>, Dekai Ye<sup>3,4</sup>, Shaopeng Wang<sup>1</sup>, Xiaolei Zuo<sup>1,\*</sup>, Min Li<sup>1,\*</sup>

<sup>1</sup>Institute of Molecular Medicine, Shanghai Key Laboratory for Nucleic Acid Chemistry and Nanomedicine, Renji Hospital, School of Medicine, Zhangjiang Institute for Advanced Study, School of Chemistry and Chemical Engineering, and National Center for Translational Medicine, Shanghai Jiao Tong University, Shanghai 200127, China.

<sup>2</sup>State Key Laboratory of Biogeology and Environmental Geology, Engineering Research Center of Nano-Geomaterials of Ministry of Education, Faculty of Materials Science and Chemistry, China University of Geosciences, Wuhan 430074, China

<sup>3</sup>Zhangjiang Laboratory, 100 Haike Road, Shanghai 201210, China

<sup>4</sup>These authors contributed equally to this work.

### **Supplementary Materials**

Figure 1 Capture yield and corresponding statistical analysis of spiked MDA-MB-231 cells captured by 2-simplex or aptamer in PBS

Figure 2 Capture of MCF-7 cells spiked in fresh human whole blood using 2-simplex or aptamer

Figure 3 Purity of captured cells in whole blood

Figure 4 Cell viability characterization of captured MCF-7 cells

Figure 5 Downstream experiments of isolated cells.

Figure 6 Fluorescence microscopy imaging of captured cells from the mixture of MCF-7 cells and Ramos cells

Figure 7 Generality verification of 2-simplex for different tumor cell lines

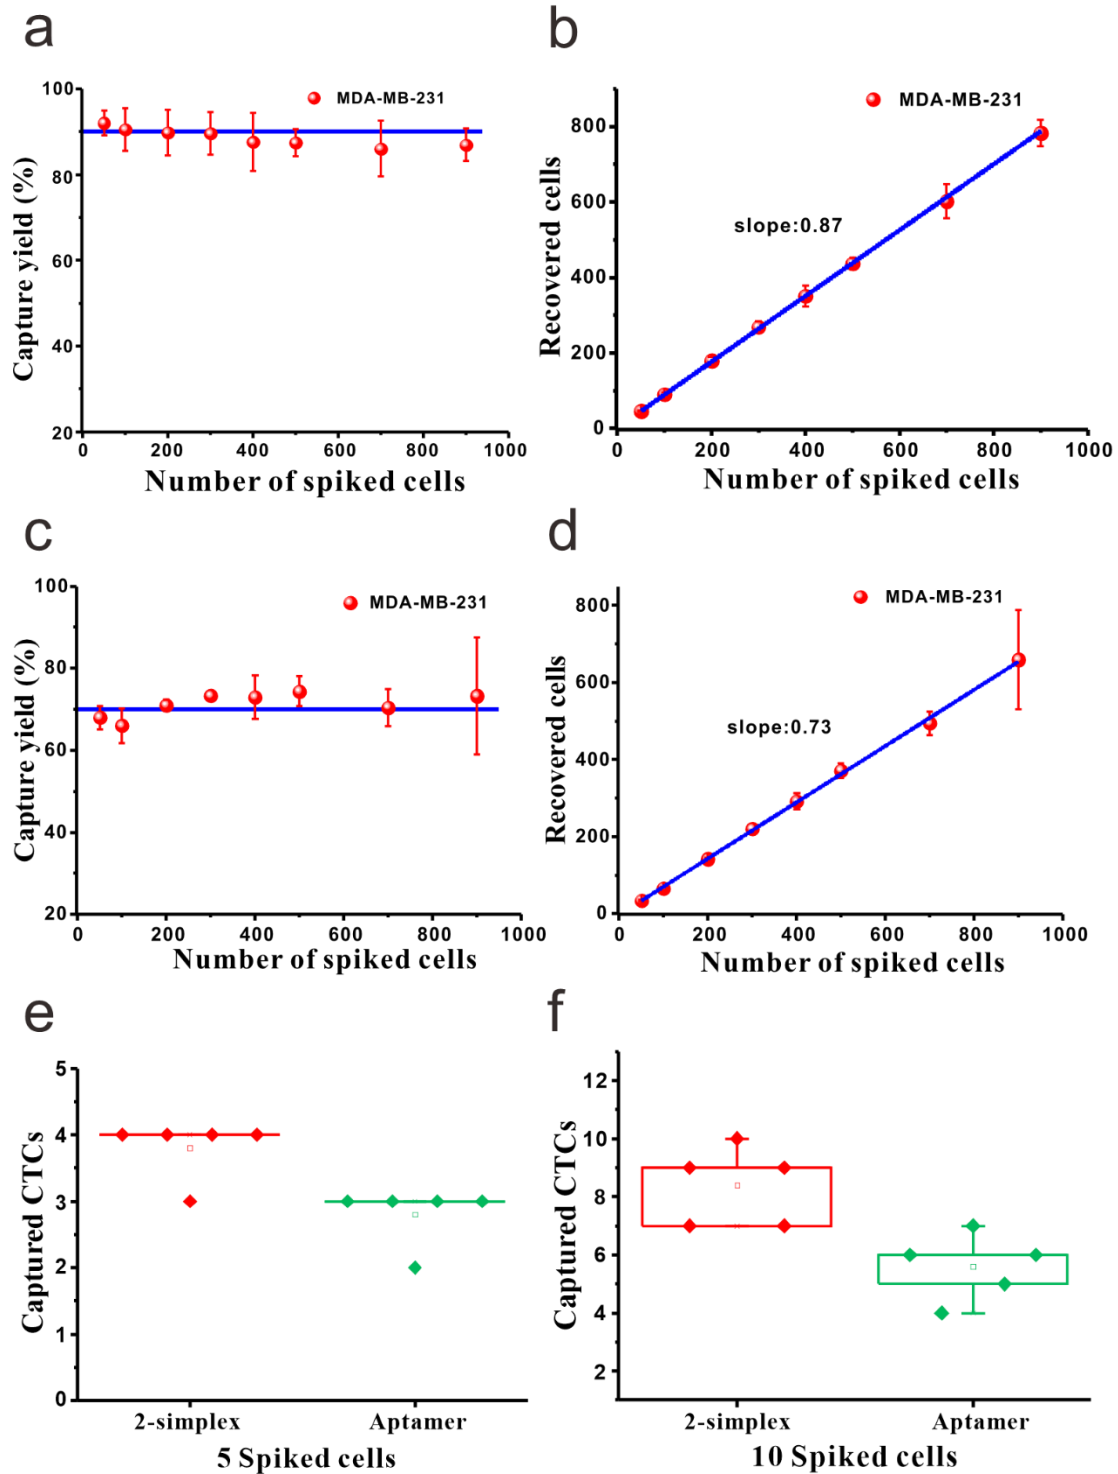

Supplementary Figure 1. Capture yield and corresponding statistical analysis of spiked MDA-MB-231 cells captured by 2-simplex or aptamer in PBS (a) Capture yields based on 2-simplex from PBS buffer spiked with various MDA-MB-231 cells. Each data point was repeated for at least 3 times. The error bars represent standard deviations of measurements within each experiment. (b) Regression analysis of capture efficiency for various target cell concentrations based on 2-simplex. The plot represents number of cells spiked versus number of cells recovered. (c) Capture yields based on aptamer from PBS buffer spiked with various MDA-MB-231 cells. Each data point was repeated in at least 3 times. The error bars represent standard deviations of measurements within

each experiment. (d) Regression analysis of capture efficiency for various target cell concentrations based on aptamer. The plot represents number of cells spiked versus number of cells recovered. (e) Cell recovery for MDA-MB-231 cells spiked into 1 mL of buffer at spike concentration of 5 cells per mL. (f) Cell recovery for MDA-MB-231 cells spiked into 1 mL of buffer at spike concentration of 10 cells per mL.

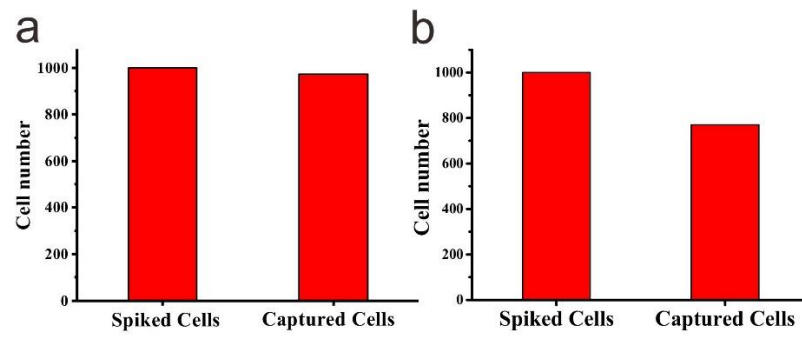

Supplementary Figure 2. Capture of MCF-7 cells spiked in fresh human whole blood using 2-simlex (a) or aptamer (b). 1000 pre-stained MCF-7 cells were spiked into 1 mL of whole blood, which was collected from healthy volunteer.

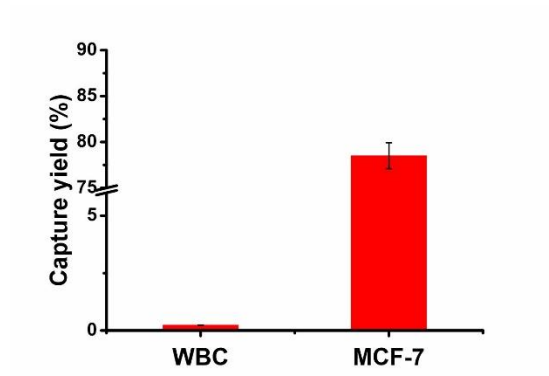

Supplementary Figure 3. Purity of captured cells in whole blood. 200 MCF-7 cells were spiked into 1 mL of whole blood, which was collected from healthy volunteer. Quantification of captured MCF-7 cells and non-specifically captured WBC using 2-simplex. Error bars represent the mean  $\pm$  s.d. of triplicates

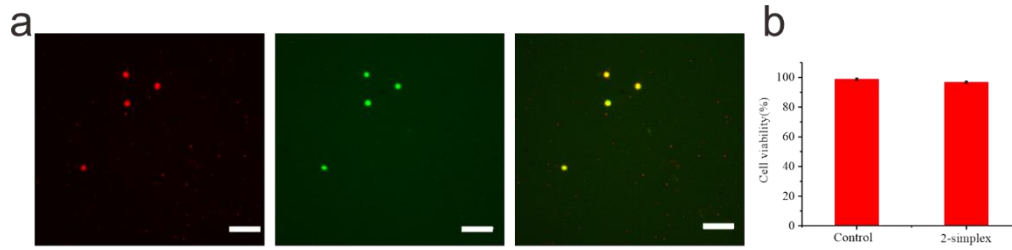

Supplementary Figure 4. Cell viability characterization of captured MCF-7 cells. (a) Fluorescence microscopy imaging of live cells and dead cells after capture. From left to right: all the spiked cells were stained with membrane dye DiI before capture (red); the captured cells were stained with Calcein AM (green); the live cells showed red-green fluorescence after merged (yellow). Scale bar: 100  $\mu$ m. (b) Cell viability analysis after magnetic separation with spiking of 400 MCF-7 cells into 0.2 mL of PBS buffer.



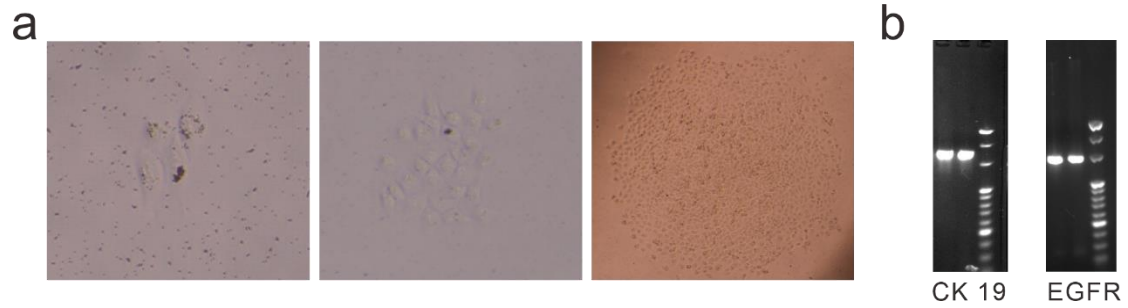

Supplementary Figure 5. Downstream experiments of isolated cells. (a) From left to right: microscopy imaging results show that captured MCF-7 cells are well attached in the flask wall, 20 $\times$  magnification; initially cultured as a single large colony after 2 days, 20 $\times$  magnification; then formed large colonies by day 7, 10 $\times$  magnification. (b) Using cDNA processed by RT-PCR as sample, results of agarose gel electrophoresis show that captured MCF-7 cells express CK19 mRNA and EGFR mRNA. (From left to right: lane 1, Captured MCF-7 cells; lane 2, Original MCF-7 cells; lane 3, 20 bp DNA ladder.)

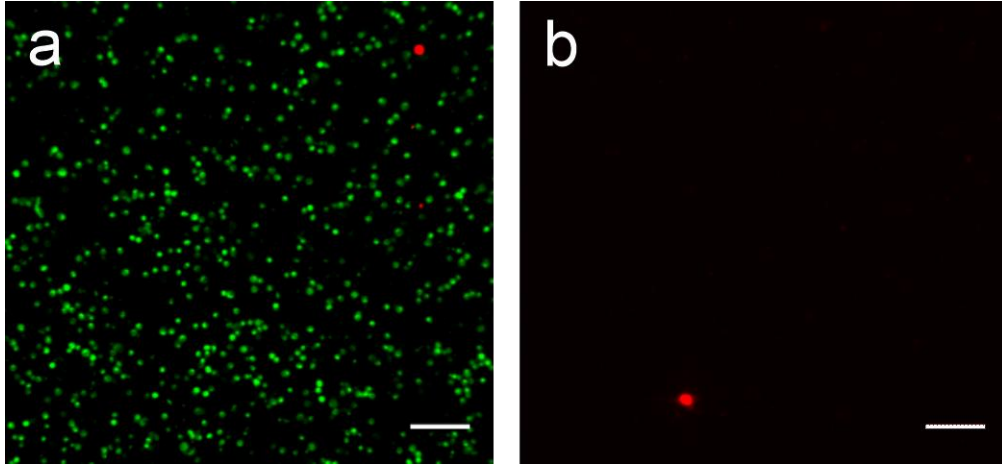

Supplementary Figure 6. Fluorescence microscopy imaging of captured cells from the mixture of MCF-7 cells (red labeled) and Ramos cells at ratio 1:1000, using 2-simplex before capture (a) and after capture (b). Scale bar, 100  $\mu\text{m}$ .

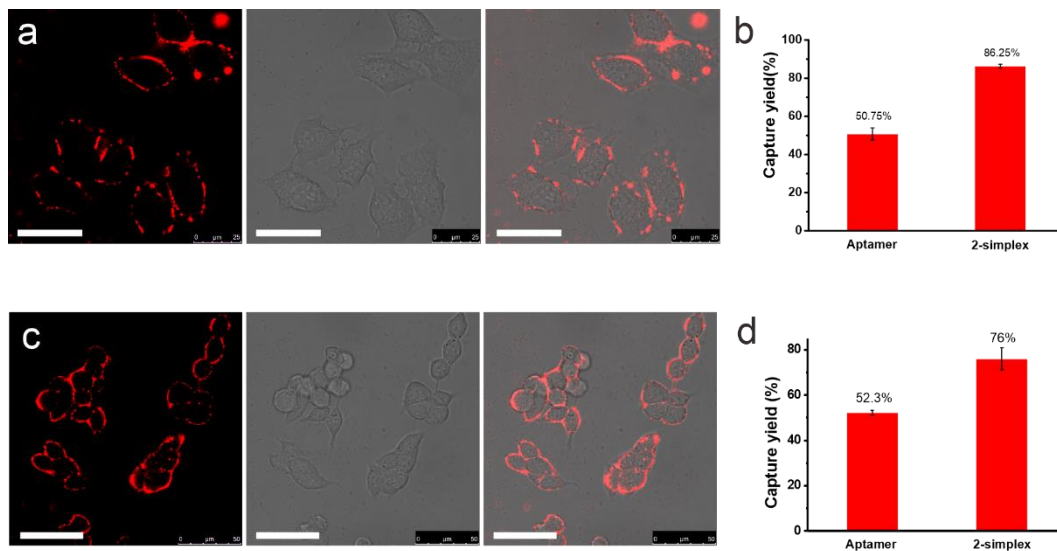

Supplementary Figure 7. Generality verification of 2-simplex for different tumor cell lines. (a) Confocal images of Her2 aptamer-based 2-simplex binding to HepG2 cells. Cy5 dye was labeled on the TDF framework of 2-simplex. From left to right: fluorescent field image, bright field image and merged image. Scale bar, 25  $\mu\text{m}$ . (b) Capture efficiency of HepG2 cells using Her2 aptamer and TDF-based 2-simplex. 200 pre-stained HepG2 cells were spiked into 1 mL of PBS buffer. (c) Confocal images of PTK7 aptamer-based 2-simplex binding to HCT 116 cells. Cy5 dye was labeled on the TDF framework of 2-simplex. From left to right: fluorescent field image, bright field image and merged image. Scale bar, 50  $\mu\text{m}$ . (d) Capture efficiency of HCT 116 cells using PTK7 aptamer and TDF-based 2-simplex. 200 pre-stained HCT 116 cells were spiked into 1 mL of PBS buffer.
