# Supplementary material for: Functionalized tetrahedral DNA frameworks for the capture of circulating tumor cells
Source: Springer Nature journal article supplement (doi:10.1038/s41596-023-00943-3), 2024-02-05
Supplement: MOESM3 [file 41596_2023_943_MOESM3_ESM12.pdf]

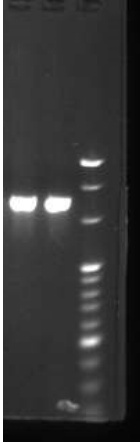

Agarose gel electrophoresis analysis of CK19 mRNA

From right to left:

lane 1: 20 bp DNA ladder

lane 2: mRNA from controlled MCF-7 cells

lane 3: mRNA from captured MCF-7 cells

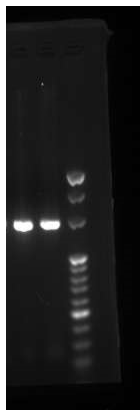

Agarose gel electrophoresis analysis of EGFR mRNA

From right to left:

lane 1: 20 bp DNA ladder

lane 2: mRNA from controlled MCF-7 cells

lane 3: mRNA from captured MCF-7 cells
